# Supplementary material for: Time required to initiate a clinical trial in Canada at the onset of the COVID-19 pandemic: an observational research-in-motion study
Source: PubMed Central journal article supplement — CMAJ Open. 2023 Jul 4;11(4):E615–20. doi: 10.9778/cmajo.20220129 (PMC10325581; doi:10.9778/cmajo.20220129), 2023-07-04
Supplement: open-2022-0129-1-at.pdf [file open-2022-0129-1-at.pdf]

Appendix 1: Incremental steps in study activation Days

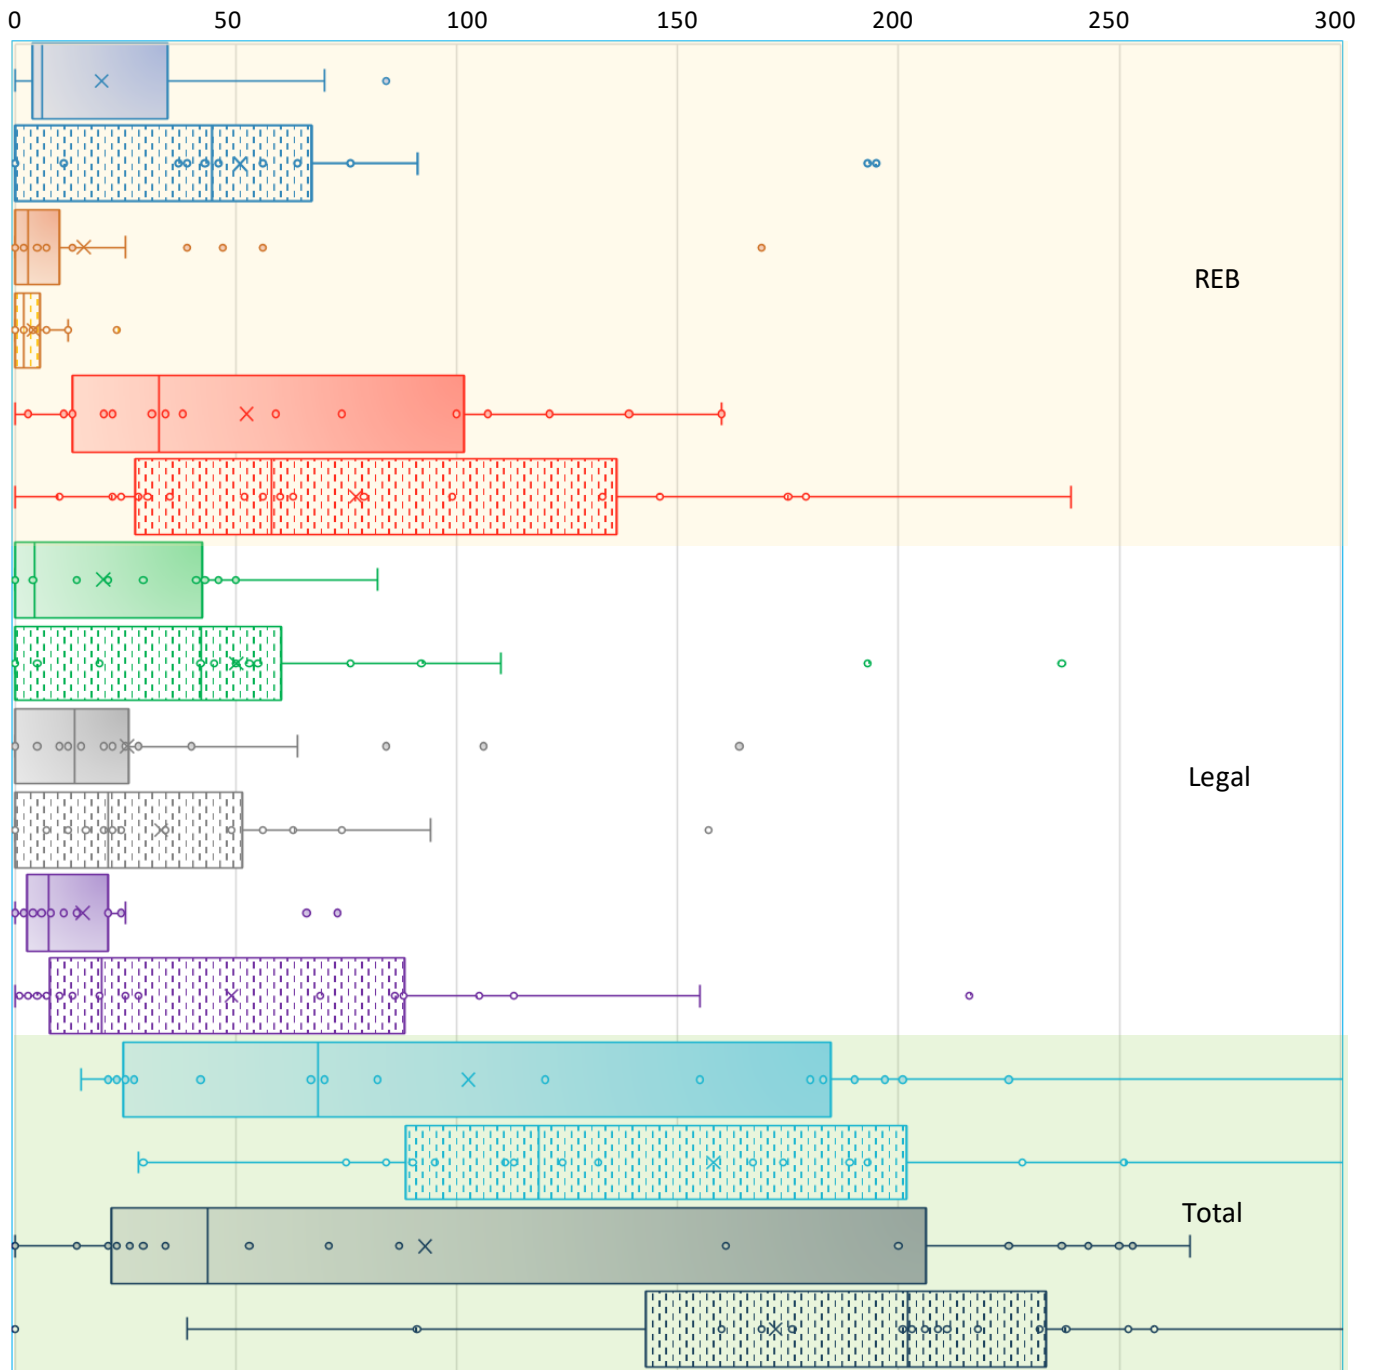

- |                                               |                                                |
|-----------------------------------------------|------------------------------------------------|
| Academic - Protocol sent to REB submission    | Community - Protocol sent to REB submission    |
| Academic - REB Submission to Approval         | Community - REB Submission to Approval         |
| Academic - REB approval to site activation    | Community - REB approval to site activation    |
| Academic - Protocol sent to legal submission  | Community - Protocol sent to legal submission  |
| Academic - Legal submission to full execution | Community - Legal submission to full execution |
| Academic - Contract FE to site activation     | Community - Contract FE to site activation     |
| Academic - Protocol sent to site activation   | Community - Protocol sent to site activation   |
| Academic - Protocol sent to 1st patient       | Community - Protocol sent to 1st patient       |
